# Supplementary material for: A one-year follow-up study of systematic impact of long COVID symptoms among patients post SARS-CoV-2 omicron variants infection in Shanghai, China
Source: PubMed Central journal article supplement — Emerg Microbes Infect. 2023 Jun 18;12(2):2220578. doi: 10.1080/22221751.2023.2220578 (PMC10281439; doi:10.1080/22221751.2023.2220578), 2023-06-18
Supplement: TEMI_A_2220578_SM7631.pdf [file TEMI_A_2220578_SM7631.pdf]

**Supplementary Table 1. Enrollment Criteria**

| <b>Enrollment Criteria for COVID-19 recovered patients for the Follow-up Visit</b> |                                                                                                                                                                                                                                                                                                                                                                                                                                                                                                                                                                                                                                                                                                                                                                                                                                                                                                                                                                                                                                                                        |
|------------------------------------------------------------------------------------|------------------------------------------------------------------------------------------------------------------------------------------------------------------------------------------------------------------------------------------------------------------------------------------------------------------------------------------------------------------------------------------------------------------------------------------------------------------------------------------------------------------------------------------------------------------------------------------------------------------------------------------------------------------------------------------------------------------------------------------------------------------------------------------------------------------------------------------------------------------------------------------------------------------------------------------------------------------------------------------------------------------------------------------------------------------------|
| Inclusion Criteria                                                                 |                                                                                                                                                                                                                                                                                                                                                                                                                                                                                                                                                                                                                                                                                                                                                                                                                                                                                                                                                                                                                                                                        |
| 1                                                                                  | <p>Patients recovered from Omicron infection discharged from Huashan Hospital after March 20 (including patients recovered from asymptomatic, mild, and severe or critical COVID-19):</p> <ol style="list-style-type: none"><li>1) Positive for SARS-CoV-2 nucleic acid test</li><li>2) Definition of different severity degrees of COVID-19:<br/>The asymptomatic type has mild clinical symptoms, and no pneumonia manifestation can be found in imaging.<br/>The mild type shows the symptoms above and pneumonia manifestation can be seen in imaging.<br/>The severe type (fulfill any one of the criteria follows):<br/>(1) shortness of breath, respiratory rate (RR) more than or equal to 30/min.<br/>(2) oxygen saturation <math>\leq 93\%</math> in the resting state.<br/>(3) arterial partial pressure of oxygen (PaO<sub>2</sub>) / fraction of inspired oxygen (FiO<sub>2</sub>) <math>\leq 300</math> mmHg.<br/>(4) clinical symptoms aggravated, and pulmonary imaging showed that the lesions progressed more than 50% within 24-48 hours.</li></ol> |
| 2                                                                                  | Age >18 years old                                                                                                                                                                                                                                                                                                                                                                                                                                                                                                                                                                                                                                                                                                                                                                                                                                                                                                                                                                                                                                                      |
| Exclusion Criteria                                                                 |                                                                                                                                                                                                                                                                                                                                                                                                                                                                                                                                                                                                                                                                                                                                                                                                                                                                                                                                                                                                                                                                        |
| 1                                                                                  | Refuse to participate in this study                                                                                                                                                                                                                                                                                                                                                                                                                                                                                                                                                                                                                                                                                                                                                                                                                                                                                                                                                                                                                                    |
| 2                                                                                  | Unable to complete necessary questionnaires                                                                                                                                                                                                                                                                                                                                                                                                                                                                                                                                                                                                                                                                                                                                                                                                                                                                                                                                                                                                                            |
| 3                                                                                  | Individuals with unknown COVID-19 vaccination history or lack of the clinical information of COVID-19 infection                                                                                                                                                                                                                                                                                                                                                                                                                                                                                                                                                                                                                                                                                                                                                                                                                                                                                                                                                        |
| <b>Enrollment Criteria for Healthy Participants</b>                                |                                                                                                                                                                                                                                                                                                                                                                                                                                                                                                                                                                                                                                                                                                                                                                                                                                                                                                                                                                                                                                                                        |
| Inclusion Criteria                                                                 |                                                                                                                                                                                                                                                                                                                                                                                                                                                                                                                                                                                                                                                                                                                                                                                                                                                                                                                                                                                                                                                                        |
| 1                                                                                  | No clinical or laboratory confirmed history of SARS-CoV-2 infection.                                                                                                                                                                                                                                                                                                                                                                                                                                                                                                                                                                                                                                                                                                                                                                                                                                                                                                                                                                                                   |
| 2                                                                                  | Age >18 years old                                                                                                                                                                                                                                                                                                                                                                                                                                                                                                                                                                                                                                                                                                                                                                                                                                                                                                                                                                                                                                                      |
| Exclusion Criteria                                                                 |                                                                                                                                                                                                                                                                                                                                                                                                                                                                                                                                                                                                                                                                                                                                                                                                                                                                                                                                                                                                                                                                        |
| 1                                                                                  | Refuse to participate in this study                                                                                                                                                                                                                                                                                                                                                                                                                                                                                                                                                                                                                                                                                                                                                                                                                                                                                                                                                                                                                                    |
| 2                                                                                  | Unable to complete necessary questionnaires                                                                                                                                                                                                                                                                                                                                                                                                                                                                                                                                                                                                                                                                                                                                                                                                                                                                                                                                                                                                                            |
| 3                                                                                  | Individuals with unknown COVID-19 vaccination history or lack of the clinical information of COVID-19 infection                                                                                                                                                                                                                                                                                                                                                                                                                                                                                                                                                                                                                                                                                                                                                                                                                                                                                                                                                        |

**Supplementary Table 2. Symptom Questionnaire for COVID-19 Survivors**

1. Have you experienced fatigue now?  
 No (go Q2)  Yes (go Q1.1)
- 1.1 Is it newly onset post COVID-19?  
 No (go Q1.2)  Yes (go Q2)
- 1.2 Is it worse than the status prior to COVID-19?  
 No  Yes
2. Have you experienced muscle weakness now?  
 No (go Q3)  Yes (go Q2.1)
- 2.1 Is it newly onset post COVID-19?  
 No (go Q2.2)  Yes (go Q3)
- 2.2 Is it worse than the status prior to COVID-19?  
 No  Yes
3. Have you experienced sleep difficulty now?  
 No (go Q4)  Yes (go Q3.1)
- 3.1 Is it newly onset post COVID-19?  
 No (go Q3.2)  Yes (go Q4)
- 3.2 Is it worse than the status prior to COVID-19?  
 No  Yes
4. Have you experienced hair loss now?  
 No (go Q5)  Yes (go Q4.1)
- 4.1 Is it newly onset post COVID-19?  
 No (go Q4.2)  Yes (go Q5)
- 4.2 Is it worse than the status prior to COVID-19?  
 No  Yes
5. Have you experienced smell disorder now?  
 No (go Q6)  Yes (go Q5.1)
- 5.1 Is it newly onset post COVID-19?  
 No (go Q5.2)  Yes (go Q6)
- 5.2 Is it worse than the status prior to COVID-19?  
 No  Yes
6. Have you experienced palpitations now?  
 No (go Q7)  Yes (go Q6.1)
- 6.1 Is it newly onset post COVID-19?  
 No (go Q6.2)  Yes (go Q7)
- 6.2 Is it worse than the status prior to COVID-19?  
 No  Yes
7. Have you experienced decreased appetite now?  
 No (go Q8)  Yes (go Q7.1)
- 7.1 Is it newly onset post COVID-19?  
 No (go Q7.2)  Yes (go Q8)
- 7.2 Is it worse than the status prior to COVID-19?  
 No  Yes
8. Have you experienced taste disorder now?

- No (go Q9)  Yes (go Q8.1)
- 8.1 Is it newly onset post COVID-19?  
 No (go Q8.2)  Yes (go Q9)
- 8.2 Is it worse than the status prior to COVID-19?  
 No  Yes
9. Have you experienced dizziness now?  
 No (go Q10)  Yes (go Q9.1)
- 9.1 Is it newly onset post COVID-19?  
 No (go Q9.2)  Yes (go Q10)
- 9.2 Is it worse than the status prior to COVID-19?  
 No  Yes
10. Have you experienced nausea or vomiting now?  
 No (go Q11)  Yes (go Q10.1)
- 10.1 Is it newly onset post COVID-19?  
 No (go Q10.2)  Yes (go Q11)
- 10.2 Is it worse than the status prior to COVID-19?  
 No  Yes
11. Have you experienced chest pain now?  
 No (go Q12)  Yes (go Q11.1)
- 11.1 Is it newly onset post COVID-19?  
 No (go Q11.2)  Yes (go Q12)
- 11.2 Is it worse than the status prior to COVID-19?  
 No  Yes
12. Have you experienced sore throat or difficult to swallow now?  
 No (go Q13)  Yes (go Q12.1)
- 12.1 Is it newly onset post COVID-19?  
 No (go Q12.2)  Yes (go Q13)
- 12.2 Is it worse than the status prior to COVID-19?  
 No  Yes
13. Have you experienced difficult to swallow now?  
 No (go Q14)  Yes (go Q13.1)
- 13.1 Is it newly onset post COVID-19?  
 No (go Q13.2)  Yes (go Q14)
- 13.2 Is it worse than the status prior to COVID-19?  
 No  Yes
14. Have you experienced skin rash now?  
 No (go Q15)  Yes (go Q14.1)
- 14.1 Is it newly onset post COVID-19?  
 No (go Q14.2)  Yes (go Q15)
- 14.2 Is it worse than the status prior to COVID-19?  
 No  Yes
15. Have you experienced myalgia now?  
 No (go Q16)  Yes (go Q15.1)
- 15.1 Is it newly onset post COVID-19?



**Supplementary Table 3. Symptom Questionnaire for Healthy Control**

Have you recently experienced any of the following symptoms that last for more than two months?

- 1  Fatigue
- 2  Muscle weakness
- 3  Sleep difficulty
- 4  Hair loss
- 5  Smell disorder
- 6  Palpitations
- 7  Decreased appetite
- 8  Taste disorder
- 9  Dizziness
- 10  Nausea or vomiting
- 11  Chest pain
- 12  Sore throat or difficult to swallow
- 13  Difficult to swallow
- 14  Skin rash
- 15  Myalgia
- 16  Headache
- 17  Cough
- 18  Joint pain

If other joints, please specify \_\_\_\_\_

| Joints            | Hand | Foot | Wrist | Ankle | Jaw | Elbow | Shoulder | Neck | Hip | Knee |
|-------------------|------|------|-------|-------|-----|-------|----------|------|-----|------|
| Tenderness        |      |      |       |       |     |       |          |      |     |      |
| Swollen           |      |      |       |       |     |       |          |      |     |      |
| Pain scale (0-10) |      |      |       |       |     |       |          |      |     |      |

0 (no pain) —————> 10 (Intolerable pain)

19. Other symptoms needed to be recorded \_\_\_\_\_.

**Supplementary Table 4. The modified British Medical Research Council (mMRC) Dyspnea Scale**

| Description                                                                                                                                           | Grade |
|-------------------------------------------------------------------------------------------------------------------------------------------------------|-------|
| I only get breathless with strenuous exercise                                                                                                         | 0     |
| I get short of breath when hurrying on level ground or walking up a slight hill                                                                       | 1     |
| On level ground, I walk slower than people of my age because of breathlessness, or I have to stop for breath when walking at my own pace on the level | 2     |
| I stop for breath after walking about 100 yards or after a few minutes on level ground                                                                | 3     |
| I am too breathless to leave the house or I am breathless when dressing/undressing                                                                    | 4     |

**Supplementary Table 5. The EuroQol Five-Dimension Five-Level (EQ-5D-5L) Questionnaire**

Under each heading, please tick the ONE box that best describes your health TODAY.

|                                                                                     |                          |
|-------------------------------------------------------------------------------------|--------------------------|
| <b>MOBILITY</b>                                                                     |                          |
| I have no problems in walking about                                                 | <input type="checkbox"/> |
| I have slight problems in walking about                                             | <input type="checkbox"/> |
| I have moderate problems in walking about                                           | <input type="checkbox"/> |
| I have severe problems in walking about                                             | <input type="checkbox"/> |
| I have severe problems in walking about                                             | <input type="checkbox"/> |
| <b>SELF-CARE</b>                                                                    |                          |
| I have no problems washing or dressing myself                                       | <input type="checkbox"/> |
| I have slight problems washing or dressing myself                                   | <input type="checkbox"/> |
| I have moderate problems washing or dressing myself                                 | <input type="checkbox"/> |
| I have severe problems washing or dressing myself                                   | <input type="checkbox"/> |
| I am unable to wash or dress myself                                                 | <input type="checkbox"/> |
| <b>USUAL ACTIVITIES</b> (e.g. work, study, housework, family or leisure activities) |                          |
| I have no problems doing my usual activities                                        | <input type="checkbox"/> |
| I have slight problems doing my usual activities                                    | <input type="checkbox"/> |
| I have moderate problems doing my usual activities                                  | <input type="checkbox"/> |
| I have severe problems doing my usual activities                                    | <input type="checkbox"/> |
| I am unable to do my usual activities                                               | <input type="checkbox"/> |
| <b>PAIN / DISCOMFORT</b>                                                            |                          |
| I have no pain or discomfort                                                        | <input type="checkbox"/> |
| I have slight pain or discomfort                                                    | <input type="checkbox"/> |
| I have moderate pain or discomfort                                                  | <input type="checkbox"/> |
| I have severe pain or discomfort                                                    | <input type="checkbox"/> |
| I have extreme pain or discomfort                                                   | <input type="checkbox"/> |
| <b>ANXIETY / DEPRESSION</b>                                                         |                          |
| I am not anxious or depressed                                                       | <input type="checkbox"/> |
| I am slightly anxious or depressed                                                  | <input type="checkbox"/> |
| I am moderately anxious or depressed                                                | <input type="checkbox"/> |
| I am severely anxious or depressed                                                  | <input type="checkbox"/> |
| I am extremely anxious or depressed                                                 | <input type="checkbox"/> |

**Supplementary Table 6. Generalized Anxiety Disorder-7 (GAD-7) Questionnaire**

Over the last 2 weeks, how often have you been bothered by any of the following problems?

|                                                    |                                                  |
|----------------------------------------------------|--------------------------------------------------|
| Feeling nervous, anxious or on edge?               | <input type="checkbox"/> Not at all              |
|                                                    | <input type="checkbox"/> Several days            |
|                                                    | <input type="checkbox"/> More than half the days |
|                                                    | <input type="checkbox"/> Nearly every day        |
| Not being able to stop or control worrying?        | <input type="checkbox"/> Not at all              |
|                                                    | <input type="checkbox"/> Several days            |
|                                                    | <input type="checkbox"/> More than half the days |
|                                                    | <input type="checkbox"/> Nearly every day        |
| Worrying too much about different things?          | <input type="checkbox"/> Not at all              |
|                                                    | <input type="checkbox"/> Several days            |
|                                                    | <input type="checkbox"/> More than half the days |
|                                                    | <input type="checkbox"/> Nearly every day        |
| Trouble relaxing?                                  | <input type="checkbox"/> Not at all              |
|                                                    | <input type="checkbox"/> Several days            |
|                                                    | <input type="checkbox"/> More than half the days |
|                                                    | <input type="checkbox"/> Nearly every day        |
| Being so restless that it is hard to sit still?    | <input type="checkbox"/> Not at all              |
|                                                    | <input type="checkbox"/> Several days            |
|                                                    | <input type="checkbox"/> More than half the days |
|                                                    | <input type="checkbox"/> Nearly every day        |
| Becoming easily annoyed or irritable?              | <input type="checkbox"/> Not at all              |
|                                                    | <input type="checkbox"/> Several days            |
|                                                    | <input type="checkbox"/> More than half the days |
|                                                    | <input type="checkbox"/> Nearly every day        |
| Feeling afraid as if something awful might happen? | <input type="checkbox"/> Not at all              |
|                                                    | <input type="checkbox"/> Several days            |
|                                                    | <input type="checkbox"/> More than half the days |
|                                                    | <input type="checkbox"/> Nearly every day        |

**Supplementary Table 7. the EuroQol Visual Analogue Scale (EQ-VAS)**

- We would like to know how good or bad your health is TODAY.
- This scale is numbered from 0 to 100.
- 100 means the best health you can imagine.  
0 means the worst health you can imagine.
- Mark an X on the scale to indicate how your health is TODAY.
- Now, please write the number you marked on the scale in the box below.

YOUR HEALTH TODAY =

**Notes:**

- There should be only ONE response for each dimension
- Missing values are preferably coded as '9'.
- Ambiguous values (e.g. two boxes are ticked for a single dimension) should be treated as missing values.
- This example is for the EQ-5D-5L Paper Self-Complete. Instructions for the interview and proxy versions are provided with those instruments.

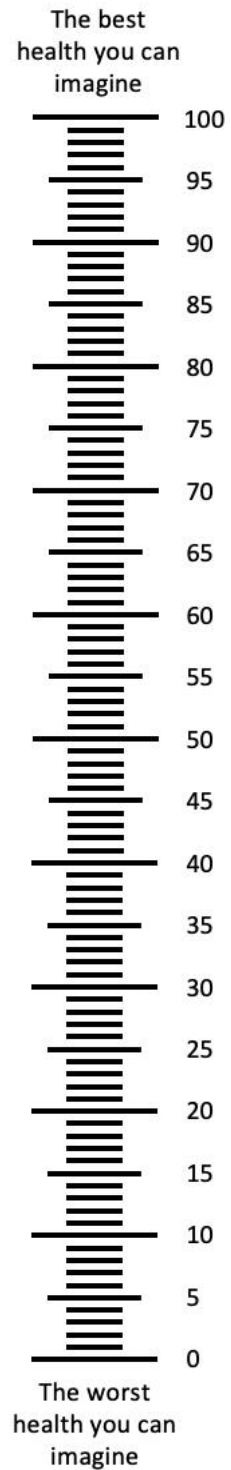



**Supplementary Table 8. The Patients Health Questionnaire (PHQ-9)**

|                                                                                                                                                                              |                                                  |
|------------------------------------------------------------------------------------------------------------------------------------------------------------------------------|--------------------------------------------------|
| Over the last two weeks, how often have you been bothered by any of the following problems?                                                                                  |                                                  |
| Little interest or pleasure in doing things?                                                                                                                                 | <input type="checkbox"/> Not at all              |
|                                                                                                                                                                              | <input type="checkbox"/> Several days            |
|                                                                                                                                                                              | <input type="checkbox"/> More than half the days |
|                                                                                                                                                                              | <input type="checkbox"/> Nearly every day        |
| Feeling down, depressed, or hopeless?                                                                                                                                        | <input type="checkbox"/> Not at all              |
|                                                                                                                                                                              | <input type="checkbox"/> Several days            |
|                                                                                                                                                                              | <input type="checkbox"/> More than half the days |
|                                                                                                                                                                              | <input type="checkbox"/> Nearly every day        |
| Trouble falling or staying asleep, or sleeping too much?                                                                                                                     | <input type="checkbox"/> Not at all              |
|                                                                                                                                                                              | <input type="checkbox"/> Several days            |
|                                                                                                                                                                              | <input type="checkbox"/> More than half the days |
|                                                                                                                                                                              | <input type="checkbox"/> Nearly every day        |
| Feeling tired or having little energy?                                                                                                                                       | <input type="checkbox"/> Not at all              |
|                                                                                                                                                                              | <input type="checkbox"/> Several days            |
|                                                                                                                                                                              | <input type="checkbox"/> More than half the days |
|                                                                                                                                                                              | <input type="checkbox"/> Nearly every day        |
| Poor appetite or overeating?                                                                                                                                                 | <input type="checkbox"/> Not at all              |
|                                                                                                                                                                              | <input type="checkbox"/> Several days            |
|                                                                                                                                                                              | <input type="checkbox"/> More than half the days |
|                                                                                                                                                                              | <input type="checkbox"/> Nearly every day        |
| Feeling bad about yourself - or that you are a failure or have let yourself or your family down?                                                                             | <input type="checkbox"/> Not at all              |
|                                                                                                                                                                              | <input type="checkbox"/> Several days            |
|                                                                                                                                                                              | <input type="checkbox"/> More than half the days |
|                                                                                                                                                                              | <input type="checkbox"/> Nearly every day        |
| Trouble concentrating on things, such as reading the newspaper or watching television?                                                                                       | <input type="checkbox"/> Not at all              |
|                                                                                                                                                                              | <input type="checkbox"/> Several days            |
|                                                                                                                                                                              | <input type="checkbox"/> More than half the days |
|                                                                                                                                                                              | <input type="checkbox"/> Nearly every day        |
| Moving or speaking so slowly that other people could have noticed?<br>Or the opposite - being so fidgety or restless that you have been moving around a lot more than usual? | <input type="checkbox"/> Not at all              |
|                                                                                                                                                                              | <input type="checkbox"/> Several days            |
|                                                                                                                                                                              | <input type="checkbox"/> More than half the days |
|                                                                                                                                                                              | <input type="checkbox"/> Nearly every day        |
| Thoughts that you would be better off dead, or of hurting yourself in some way?                                                                                              | <input type="checkbox"/> Not at all              |
|                                                                                                                                                                              | <input type="checkbox"/> Several days            |
|                                                                                                                                                                              | <input type="checkbox"/> More than half the days |
|                                                                                                                                                                              | <input type="checkbox"/> Nearly every day        |
| Total =                                                                                                                                                                      |                                                  |
| Depression Severity: 0-4 none, 5-9 mild, 10-14 moderate, 15-19 moderately severe, 20-27 severe.                                                                              |                                                  |

**Supplementary Table 9. PTSD Checklist – Civilian Version (PCL-C)**

| No. | Response                                                                                                                                              | Not at all<br>(1) | A little bit<br>(2) | Moderately<br>(3) | Quite a bit<br>(4) | Extremely<br>(5) |
|-----|-------------------------------------------------------------------------------------------------------------------------------------------------------|-------------------|---------------------|-------------------|--------------------|------------------|
| 1.  | Repeated, disturbing memories, thoughts, or images of a stressful experience from the past?                                                           |                   |                     |                   |                    |                  |
| 2.  | Repeated, disturbing dreams of a stressful experience from the past?                                                                                  |                   |                     |                   |                    |                  |
| 3.  | Suddenly acting or feeling as if a stressful experience were happening again (as if you were reliving it)?                                            |                   |                     |                   |                    |                  |
| 4.  | Feeling very upset when something reminded you of a stressful experience from the past?                                                               |                   |                     |                   |                    |                  |
| 5.  | Having physical reactions (e.g., heart pounding, trouble breathing, or sweating) when something reminded you of a stressful experience from the past? |                   |                     |                   |                    |                  |
| 6.  | Avoid thinking about or talking about a stressful experience from the past or avoid having feelings related to it?                                    |                   |                     |                   |                    |                  |
| 7.  | Avoid activities or situations because they remind you of a stressful experience from the past?                                                       |                   |                     |                   |                    |                  |
| 8.  | Trouble remembering important parts of a stressful experience from the past?                                                                          |                   |                     |                   |                    |                  |
| 9.  | Loss of interest in things that you used to enjoy?                                                                                                    |                   |                     |                   |                    |                  |
| 10. | Feeling distant or cut off from other people?                                                                                                         |                   |                     |                   |                    |                  |
| 11. | Feeling emotionally numb or being unable to have loving feelings for those close to you?                                                              |                   |                     |                   |                    |                  |
| 12. | Feeling as if your future will somehow be cut short?                                                                                                  |                   |                     |                   |                    |                  |
| 13. | Trouble falling or staying asleep?                                                                                                                    |                   |                     |                   |                    |                  |
| 14. | Feeling irritable or having angry outbursts?                                                                                                          |                   |                     |                   |                    |                  |
| 15. | Having difficulty concentrating?                                                                                                                      |                   |                     |                   |                    |                  |
| 16. | Being “super alert” or watchful on guard?                                                                                                             |                   |                     |                   |                    |                  |
| 17. | Feeling jumpy or easily startled?                                                                                                                     |                   |                     |                   |                    |                  |
